# Supplementary material for: The effects of meditation on length of telomeres in healthy individuals: a systematic review
Source: PubMed Central journal article supplement (PMC8139075; doi:10.1186/s13643-021-01699-1), 2021-05-21
Supplement: 13643_2021_1699_MOESM1_ESM.pdf [file 13643_2021_1699_MOESM1_ESM.pdf]

**Table 1: Search strategy for databases**

| <b>Search number</b> | <b>Query</b>                        |
|----------------------|-------------------------------------|
| 1                    | “Meditation” AND “Telomere length”  |
| 2                    | “Meditation” AND “Telomere”         |
| 3                    | “Meditation” AND “Telomerase”       |
| 4                    | “Mindfulness” AND “Telomere”        |
| 5                    | “Mindfulness” AND “Telomere length” |
| 6                    | “Mindfulness” AND “Telomerase”      |
| 7                    | “Healthy Individuals”               |
| 8                    | 1 OR 4 AND 7                        |
| 9                    | 1 OR 6 AND 7                        |
| 10                   | 2 OR 5 AND 7                        |
| 11                   | 2 OR 6 AND 7                        |
| 12                   | 3 OR 4 AND 7                        |
| 13                   | 3 OR 5 AND 7                        |
| 14                   | Limit 13 to RCT AND English         |
| 15                   | Limit 13 to CCS AND English         |
