# Supplementary material for: The effects of meditation on length of telomeres in healthy individuals: a systematic review
Source: PubMed Central journal article supplement (PMC8139075; doi:10.1186/s13643-021-01699-1), 2021-05-21
Supplement: 13643_2021_1699_MOESM3_ESM.pdf [file 13643_2021_1699_MOESM3_ESM.pdf]

**Table 3: Characteristics of the included studies**

| <b>Study</b>             | <b>Country of the study</b> | <b>Study design</b>         | <b>Study setting</b>                                            | <b>Meditators*</b>                                                                                                                                                                                           | <b>Sample size/sample size calculation</b> | <b>Comparison group*</b>                                                                                                                                                                                                                 |
|--------------------------|-----------------------------|-----------------------------|-----------------------------------------------------------------|--------------------------------------------------------------------------------------------------------------------------------------------------------------------------------------------------------------|--------------------------------------------|------------------------------------------------------------------------------------------------------------------------------------------------------------------------------------------------------------------------------------------|
| <b>Hoge et al., 2013</b> | USA                         | Case-control study          | Vipassana meditation centers and retreat centers in New England | Experienced meditators over the age of 18, who practiced loving-kindness meditation for more than 4 years regularly and attended at least one overnight meditation retreat.                                  | 37/not specified                           | Control participants were also aged more than 18 and they were not experienced with any meditation and yoga practice. Comparison group matched with mean age ( $\pm 5$ years), gender, education level and levels of depression history. |
| <b>Alda et al., 2016</b> | Spain                       | Case-control study          | Soto Spanish Buddhist community                                 | Zen Experienced meditators aged between 18-65 years, who practiced continuous Zen meditation for more than 10 years with a mean at least of 60 min/per day of formal practice during the entire period.      | 40/not specified                           | Controls were relatives, and/or friends of the cases who had a similar lifestyle with the age range between 18-65 years and matched by the age ( $\pm 2$ years), gender and ethnic group.                                                |
| <b>Le et al., 2019</b>   | USA                         | Randomized controlled trial | Durham and Orange county of North Carolina                      | Healthy midlife adults aged between 35-64 years, who had home internet access, little to no meditation experience, and no current chronic illnesses or disabilities. These participants received the loving- | 176/not specified                          | Waitlist control group, who also had home internet access, little to no meditation experience, and no current chronic illnesses or disabilities. They were also aged between 35-64 years and they did                                    |

|                               |         |                             |                                                                                          |                                                                                                                                                                                                                                 |                   |                                                                                                                                                                                                                    |
|-------------------------------|---------|-----------------------------|------------------------------------------------------------------------------------------|---------------------------------------------------------------------------------------------------------------------------------------------------------------------------------------------------------------------------------|-------------------|--------------------------------------------------------------------------------------------------------------------------------------------------------------------------------------------------------------------|
|                               |         |                             |                                                                                          | kindness/mindfulness meditation training.                                                                                                                                                                                       |                   | not receive any meditation training.                                                                                                                                                                               |
| <b>Puhlmann et al., 2019</b>  | Germany | Randomized controlled trial | The European Community's Seventh Framework program under the ReSource Project            | Healthy individuals with the age range of 20-55, who were meditation naïve, and extensively screened for mental and physical illnesses. These participants received the presence, affect, and perspective meditation trainings. | 332/not specified | Retest control group with a age range of 20-55 years, who were also meditation naïve, and extensively screened for mental and physical illnesses. They did not underwent all the tests but no meditation training. |
| <b>Mendioroz et al., 2020</b> | Spain   | Case-control study          | Mindfulness program at the University of Zaragoza and Spanish Association of Mindfulness | Long-term meditators who practiced continuous mindfulness meditation for more than 10 years with a mean at least of 60 min/per day of formal practice during the entire period.                                                 | 34/not specified  | Controls were relatives, and/or friends of the cases who had a similar lifestyle and matched by the age ( $\pm 2$ years), gender and ethnic group.                                                                 |

PCR – Polymerase Chain Reaction

\*All Participants were healthy adults
