# Supplementary material for: The effects of meditation on length of telomeres in healthy individuals: a systematic review
Source: PubMed Central journal article supplement (PMC8139075; doi:10.1186/s13643-021-01699-1), 2021-05-21
Supplement: 13643_2021_1699_MOESM5_ESM.pdf [file 13643_2021_1699_MOESM5_ESM.pdf]

**Table 5: Methodological quality of Case-Control Studies**

|                                                                                                                                     | Yes<br>Marks =<br>1 | No<br>Marks<br>= 0 | Unclear<br>Marks =<br>0.5 | Not<br>applicable |
|-------------------------------------------------------------------------------------------------------------------------------------|---------------------|--------------------|---------------------------|-------------------|
| <i>Alda et al., 2016</i>                                                                                                            |                     |                    |                           |                   |
| Were the groups comparable other than the presence of disease in cases or absence of disease in controls?<br>(disease = meditation) | x                   |                    |                           |                   |
| Were cases and controls matched appropriately?                                                                                      | x                   |                    |                           |                   |
| Were the same criteria used for identification of cases and controls?                                                               | x                   |                    |                           |                   |
| Was exposure measured in a standard, valid, and reliable way?                                                                       | x                   |                    |                           |                   |
| Was exposure measured in the same way for cases and controls?                                                                       | x                   |                    |                           |                   |
| Were confounding factors identified?                                                                                                | x                   |                    |                           |                   |
| Were strategies to deal with confounding factors stated?                                                                            | x                   |                    |                           |                   |
| Were outcomes assessed in a standard, valid and reliable way for cases and controls?                                                | x                   |                    |                           |                   |
| Was the exposure period of interest long enough to be meaningful?                                                                   | x                   |                    |                           |                   |
| Was appropriate statistical analysis used?                                                                                          | x                   |                    |                           |                   |
| <i>Hoge et al., 2013</i>                                                                                                            |                     |                    |                           |                   |
| Were the groups comparable other than the presence of disease in cases or absence of disease in controls?<br>(disease = meditation) | x                   |                    |                           |                   |
| Were cases and controls matched appropriately?                                                                                      | x                   |                    |                           |                   |
| Were the same criteria used for identification of cases and controls?                                                               | x                   |                    |                           |                   |
| Was exposure measured in a standard, valid, and reliable way?                                                                       | x                   |                    |                           |                   |
| Was exposure measured in the same way for cases and controls?                                                                       | x                   |                    |                           |                   |
| Were confounding factors identified?                                                                                                | x                   |                    |                           |                   |
| Were strategies to deal with confounding factors stated?                                                                            | x                   |                    |                           |                   |
| Were outcomes assessed in a standard, valid and reliable way for cases and controls?                                                | x                   |                    |                           |                   |
| Was the exposure period of interest long enough to be meaningful?                                                                   | x                   |                    |                           |                   |
| Was appropriate statistical analysis used?                                                                                          | x                   |                    |                           |                   |

|                                                                                                                                     |   |   |
|-------------------------------------------------------------------------------------------------------------------------------------|---|---|
| Were the groups comparable other than the presence of disease in cases or absence of disease in controls?<br>(disease = meditation) | x |   |
| Were cases and controls matched appropriately?                                                                                      |   | x |
| Were the same criteria used for identification of cases and controls?                                                               | x |   |
| Was exposure measured in a standard, valid, and reliable way?                                                                       | x |   |
| Was exposure measured in the same way for cases and controls?                                                                       | x |   |
| Were confounding factors identified?                                                                                                | x |   |
| Were strategies to deal with confounding factors stated?                                                                            | x |   |
| Were outcomes assessed in a standard, valid and reliable way for cases and controls?                                                | x |   |
| Was the exposure period of interest long enough to be meaningful?                                                                   | x |   |
| Was appropriate statistical analysis used?                                                                                          | x |   |

---
