# Supplementary material for: The effects of meditation on length of telomeres in healthy individuals: a systematic review
Source: PubMed Central journal article supplement (PMC8139075; doi:10.1186/s13643-021-01699-1), 2021-05-21
Supplement: 13643_2021_1699_MOESM6_ESM.pdf [file 13643_2021_1699_MOESM6_ESM.pdf]

**Table 6: Summary of findings for the main comparisons**

| Study                         | Sample size/sample size calculation | Cases/ Intervention (n) | Controls (n) | Measure used to assess the TL | Outcomes                                                                                                                                                                                                                                 |
|-------------------------------|-------------------------------------|-------------------------|--------------|-------------------------------|------------------------------------------------------------------------------------------------------------------------------------------------------------------------------------------------------------------------------------------|
| <b>Hoge et al., 2013</b>      | 37/not specified                    | 15                      | 22           | Real Time PCR                 | Meditators have median relative longer telomeres (0.39) than controls (0.27)<br>Women meditators had a significantly longer TL (0.42) than controls (0.31) (p = 0.007)                                                                   |
| <b>Alda et al., 2016</b>      | 40/not specified                    | 20                      | 20           | <i>In situ</i> Hybridization  | Expert meditators have significantly longer median TL (10.82 kb) compared to the comparison group (9.94 kb) (p = 0.005)                                                                                                                  |
| <b>Le et al., 2019</b>        | 176/not specified                   | LKM - 63<br>MM - 62     | 51           | Real Time PCR                 | According to the TL difference between pre-post interventions:<br>LKM group - significantly lower decrease in TL (0.048) compared to controls (0.07): (p =0.024)<br>MM group – no TL difference (0.019) compared to control group (0.07) |
| <b>Puhlmann et al., 2019</b>  | 332/not specified                   | 222                     | 76           | Real Time PCR                 | Control group had 0.004 difference in relative length while the other three interventions, presence, affect and perspective had -0.007, -0.005, and -0.001 TL changes respectively. However, these results were not significant.         |
| <b>Mendioroz et al., 2020</b> | 34/not specified                    | 17                      | 17           | <i>In situ</i> Hybridization  | Meditators have shown longer TLs (mean = 10.47, SD = 0.86) compared to controls (mean = 9.87, SD = 0.94) without any statistical significance, but showing a strong trend (t = -1.94; df = 32; p = 0.002)                                |

LKM: Loving-Kindness Meditation

MM: Mindfulness Meditation

PCR – Real Time Polymerase Chain Reaction
