# Supplementary material for: The effects of meditation on length of telomeres in healthy individuals: a systematic review
Source: PubMed Central journal article supplement (PMC8139075; doi:10.1186/s13643-021-01699-1), 2021-05-21
Supplement: 13643_2021_1699_MOESM8_ESM.pdf [file 13643_2021_1699_MOESM8_ESM.pdf]

**Table 8: The list of excluded publications and reasons for exclusions**

| Title                                                                                                                                                                                                                                                                                                                                                                                                                                                                                                                                               | Reason for exclusion                                                                                                                                                                                                         |
|-----------------------------------------------------------------------------------------------------------------------------------------------------------------------------------------------------------------------------------------------------------------------------------------------------------------------------------------------------------------------------------------------------------------------------------------------------------------------------------------------------------------------------------------------------|------------------------------------------------------------------------------------------------------------------------------------------------------------------------------------------------------------------------------|
| <p>Carlson, L. E., Zelinski, E. L., Specia, M., Balneaves, L. G., Jones, J. M., Santa, D., ... Vohra, S. (2017). Protocol for the MATCH study : Mindfulness and Tai Chi for cancer health A preference-based multi-site randomized comparative effectiveness trial ( CET ) of Mindfulness-Based Cancer Recovery ( MBCR ) vs . Tai Chi / Qigong ( TCQ ) for cancer survivors A . <i>Contemporary Clinical Trials</i>, 59(January), 64–76.<br/> <a href="https://doi.org/10.1016/j.cct.2017.05.015">https://doi.org/10.1016/j.cct.2017.05.015</a></p> | <p>Study design: Preference based comparative effectiveness trial</p> <p>Intervention: Tai chi – qigong</p> <p>Study group: Cancer survivors diagnosed with any type cancer excluding brain, completed primary treatment</p> |
| <p>Epel, E. S., Puterman, E., Lin, J., Blackburn, E., Lazaro, A., &amp; Mendes, W. B. (2013). <i>Wandering Minds and Aging Cells</i>. <a href="https://doi.org/10.1177/2167702612460234">https://doi.org/10.1177/2167702612460234</a></p>                                                                                                                                                                                                                                                                                                           | <p>Study design: A trait-like aspect of mind wandering based on self-report</p>                                                                                                                                              |
| <p>Leung, C. W., Laraia, B. A., Bush, N. R., Lin, J., Blackburn, E. H., Adler, N. E., &amp; Epel, E. S. (2016). <i>Sugary beverage and food consumption , and leukocyte telomere length maintenance in pregnant women</i>. (February), 1–3. <a href="https://doi.org/10.1038/ejcn.2016.93">https://doi.org/10.1038/ejcn.2016.93</a></p>                                                                                                                                                                                                             | <p>Study group; pregnant women</p>                                                                                                                                                                                           |
| <p>Mason, A. E., Hecht, F. M., Daubenmier, J. J., David, A., Lin, J., Moran, P. J., ... Epel, E. S. (2019). <i>Weight loss, weight-loss maintenance, and cellular aging in the Supporting Health through Nutrition and Exercise (SHINE) Study</i>. 80(7), 609–619.<br/> <a href="https://doi.org/10.1097/PSY.0000000000000616">https://doi.org/10.1097/PSY.0000000000000616</a>.Weight</p>                                                                                                                                                          | <p>Intervention: weight-loss program with or without mindfulness training</p> <p>study group: abnormal obesity adults</p>                                                                                                    |
| <p>Nelson, B. W., Allen, N. B., &amp; Laurent, H. (2018). Psychoneuroendocrinology Infant HPA axis as a potential mechanism linking maternal mental health and infant telomere length ☆. <i>Psychoneuroendocrinology</i>, 88(June 2017), 38–46.<br/> <a href="https://doi.org/10.1016/j.psyneuen.2017.11.008">https://doi.org/10.1016/j.psyneuen.2017.11.008</a></p>                                                                                                                                                                                | <p>Study design: Neither RCT or CCS</p> <p>Outcome: mother's and infant's telomere length</p>                                                                                                                                |
| <p>Garland, S. N., &amp; Carlson, L. E. (2015). <i>The impact of mindfulness-based interventions on symptom burden , positive psychological outcomes , and biomarkers in cancer patients</i>. 121–131.</p>                                                                                                                                                                                                                                                                                                                                          | <p>Review article</p>                                                                                                                                                                                                        |

|                                                                                                                                                                                                                                                                                                                                                                                                                                            |                                                                                                                                                                       |
|--------------------------------------------------------------------------------------------------------------------------------------------------------------------------------------------------------------------------------------------------------------------------------------------------------------------------------------------------------------------------------------------------------------------------------------------|-----------------------------------------------------------------------------------------------------------------------------------------------------------------------|
| <p>Daubenmier, J., Lin, J., Blackburn, E., Hecht, F. M., Kristeller, J., Maninger, N., ... Epel, E. (2012). <i>Changes in stress , eating , and metabolic factors are related to changes in telomerase activity in a randomized mindfulness intervention pilot study.</i><br/> <a href="https://doi.org/10.1016/j.psyneuen.2011.10.008">https://doi.org/10.1016/j.psyneuen.2011.10.008</a></p>                                             | <p>Study group: Obese women</p>                                                                                                                                       |
| <p>Duraimani, S., Schneider, R. H., Randall, O. S., Nidich, S. I., Xu, S., Ketete, M., ... Gaylord-king, C. (2015). <i>Effects of Lifestyle Modification on Telomerase Gene Expression in Hypertensive Patients : A Pilot Trial of Stress Reduction and Health Education Programs in African Americans.</i> 1–18.<br/> <a href="https://doi.org/10.1371/journal.pone.0142689">https://doi.org/10.1371/journal.pone.0142689</a></p>         | <p>Study group: African American men and women with stage I hypertension</p>                                                                                          |
| <p>Jacobs, T. L., Epel, E. S., Lin, J., Blackburn, E. H., Wolkowitz, O. M., Bridwell, D. A., ... Saron, C. D. (2010). Intensive meditation training , immune cell telomerase activity , and psychological mediators. <i>Psychoneuroendocrinology.</i><br/> <a href="https://doi.org/10.1016/j.psyneuen.2010.09.010">https://doi.org/10.1016/j.psyneuen.2010.09.010</a></p>                                                                 | <p>Outcome: Telomerase activity</p>                                                                                                                                   |
| <p>Kumar, S. B., Yadav, R., Yadav, R. K., Tolahunase, M., &amp; Dada, R. (2015). <i>Telomerase Activity and Cellular Aging Might Be Positively Modified by a Yoga-Based Lifestyle Intervention : 00(0), 1–3.</i><br/> <a href="https://doi.org/10.1089/acm.2014.0298">https://doi.org/10.1089/acm.2014.0298</a></p>                                                                                                                        | <p>Study design: Case report<br/> Outcome: Telomerase activity</p>                                                                                                    |
| <p>A pilot study of yogic meditation for family dementia caregivers Lavretsky, H., Epel, E. S., Siddarth, P., Nazarian, N., Khalsa, D. S., Lin, J., ... Irwin, M. R. (2012). <i>A pilot study of yogic meditation for family dementia caregivers with depressive symptoms : effects on mental health , cognition , and telomerase activity †.</i><br/> <a href="https://doi.org/10.1002/gps.3790">https://doi.org/10.1002/gps.3790</a></p> | <p>Study population: Family dementia caregivers with depressive symptoms<br/> Outcome: Telomerase activity</p>                                                        |
| <p>Leung, C. W., Laraia, B. A., Coleman-phox, K., Nicole, R., Lin, J., Blackburn, E. H., ... Epel, E. S. (2017). <i>length maintenance in pregnant women.</i> 70(9), 1086–1088.<br/> <a href="https://doi.org/10.1038/ejcn.2016.93.Sugary">https://doi.org/10.1038/ejcn.2016.93.Sugary</a></p>                                                                                                                                             | <p>Study population: Pregnant women<br/> Study design: Cohort study<br/> Intervention: Mindfulness program on psychosocial well-being and gestational weight gain</p> |

|                                                                                                                                                                                                                                                                                                                                                                                                   |                                                                                                                       |
|---------------------------------------------------------------------------------------------------------------------------------------------------------------------------------------------------------------------------------------------------------------------------------------------------------------------------------------------------------------------------------------------------|-----------------------------------------------------------------------------------------------------------------------|
| <p>Ornish, D., Lin, J., Daubenmier, J., Weidner, G., Epel, E., Kemp, C., ... Blackburn, E. H. (2008). Increased telomerase activity and comprehensive lifestyle changes : a pilot study. <i>Lancet Oncology</i>, 9(11), 1048–1057. <a href="https://doi.org/10.1016/S1470-2045(08)70234-1">https://doi.org/10.1016/S1470-2045(08)70234-1</a></p>                                                  | <p>Study population: Low-risk prostate cancer<br/>Outcome: Telomerase activity</p>                                    |
| <p>Ho, R. T. H., Ph, D., &amp; Chan, J. S. M. (2012). <i>A Randomized Controlled Trial of Qigong Exercise on Fatigue Symptoms , Functioning , and Telomerase Activity in Persons with Chronic Fatigue or Chronic Fatigue Syndrome</i>. 160–170. <a href="https://doi.org/10.1007/s12160-012-9381-6">https://doi.org/10.1007/s12160-012-9381-6</a></p>                                             | <p>Study population: Chronic Fatigue or Chronic Fatigue Syndrome patients<br/>Outcome: Telomerase activity</p>        |
| <p>Tolahunase, M., Sagar, R., &amp; Dada, R. (2017). <i>Impact of Yoga and Meditation on Cellular Aging in Apparently Healthy Individuals : A Prospective , Open-Label Single-Arm Exploratory Study</i>. 2017.</p>                                                                                                                                                                                | <p>Intervention: Yoga<br/>Study design: A Prospective, Open-Label Single-Arm Exploratory Study</p>                    |
| <p>Tolahunase, Madhuri R, Sagar, R., Faiq, M., &amp; Dada, R. (2018). <i>Yoga- and meditation-based lifestyle intervention increases neuroplasticity and reduces severity of major depressive disorder: A randomized controlled trial</i>. <a href="https://doi.org/10.3233/RNN-170810">https://doi.org/10.3233/RNN-170810</a></p>                                                                | <p>Intervention: Yoga<br/>Study population: Major depressive disorder</p>                                             |
| <p>Carlson, L. E., Beattie, T. L., Giese-Davis, J., Faris, P., Tamagawa, R., Fick, L. J., ... Specca, M. (2015). Mindfulness-based cancer recovery and supportive-expressive therapy maintain telomere length relative to controls in distressed breast cancer survivors. <i>Cancer</i>, 121(3), 476–484. <a href="https://doi.org/10.1002/cncr.29063">https://doi.org/10.1002/cncr.29063</a></p> | <p>Study population: Breast cancer survivors</p>                                                                      |
| <p>Lengacher, C. A., Reich, R. R., Kip, K. E., Barta, M., Ramesar, S., Paterson, C. L., ... Park, J. Y. (2014). Influence of Mindfulness-Based Stress Reduction (MBSR) on Telomerase Activity in Women With Breast Cancer (BC). <i>Biological Research for Nursing</i>, 16(4), 438–447. <a href="https://doi.org/10.1177/1099800413519495">https://doi.org/10.1177/1099800413519495</a></p>       | <p>Study population: Breast cancer patients<br/>Outcome: Telomerase activity</p>                                      |
| <p>Maddux, R. E., Daukantaité, D., &amp; Tellhed, U. (2018). <i>The effects of yoga on stress and psychological health among employees : an 8- and 16-week intervention study employees : an 8- and 16-week intervention study</i>. 5806. <a href="https://doi.org/10.1080/10615806.2017.1405261">https://doi.org/10.1080/10615806.2017.1405261</a></p>                                           | <p>Study population: Patients, with depression, anxiety and stress and adjustment disorders, and healthy controls</p> |

|                                                                                                                                                                                                                                                                                                                                                                                                                                                           |                                                                                       |
|-----------------------------------------------------------------------------------------------------------------------------------------------------------------------------------------------------------------------------------------------------------------------------------------------------------------------------------------------------------------------------------------------------------------------------------------------------------|---------------------------------------------------------------------------------------|
| <p>Conklin, Q. A., King, B. G., Zanesco, A. P., Lin, J., Hamidi, A. B., Pokorny, J. J., ... Saron, C. D. (2018). Insight meditation and telomere biology: The effects of intensive retreat and the moderating role of personality. <i>Brain, Behavior, and Immunity</i>, 70, 233–245. <a href="https://doi.org/10.1016/j.bbi.2018.03.003">https://doi.org/10.1016/j.bbi.2018.03.003</a></p>                                                               | <p>Study population: Expert meditators have received a meditation intervention.</p>   |
| <p>Innes, K. E., Selfe, T. K., Brundage, K., Montgomery, C., Wen, S., Kandati, S., ... Huysmans, Z. (2018). Effects of Meditation and Music-Listening on Blood Biomarkers of Cellular Aging and Alzheimer’s Disease in Adults with Subjective Cognitive Decline: An Exploratory Randomized Clinical Trial. <i>Journal of Alzheimer’s Disease</i>, 66(3), 947–970. <a href="https://doi.org/10.3233/JAD-180164">https://doi.org/10.3233/JAD-180164</a></p> | <p>Study population: Alzheimer’s disease patients</p>                                 |
| <p>Thimmapuram, J., Pargament, R., Sibliss, K., Grim, R., Risques, R., &amp; Toorens, E. (2017). Effect of heartfulness meditation on burnout, emotional wellness, and telomere length in health care professionals. <i>Journal of Community Hospital Internal Medicine Perspectives</i>, 7(1), 21–27. <a href="https://doi.org/10.1080/20009666.2016.1270806">https://doi.org/10.1080/20009666.2016.1270806</a></p>                                      | <p>Study design: Cohort study</p>                                                     |
| <p>Tolahunase, M R, Sagar, R., Chaurasia, P., &amp; Dada, R. (2018). Impact of yoga- and meditation-based lifestyle intervention on depression, quality of life, and cellular aging in infertile couples. <i>Fertility and Sterility</i>, 110(4), e67. <a href="https://doi.org/10.1016/j.fertnstert.2018.07.203">https://doi.org/10.1016/j.fertnstert.2018.07.203</a></p>                                                                                | <p>Study population: Infertility couples<br/>Intervention: Yoga</p>                   |
| <p>Rao KS, Chakraharti SK, Dongare VS, et al., Antiaging Effects of an Intensive Mind and Body Therapeutic Program through Enhancement of Telomerase Activity and Adult Stem cell Counts. <i>J Stem Cells</i>. 2015;10(2):107-125</p>                                                                                                                                                                                                                     | <p>Outcome: Telomerase activity<br/>Study population: Healthy adults and patients</p> |
| <p>Maddux, R. E., Daukantaitė, D., &amp; Tellhed, U. (2018). <i>The effects of yoga on stress and psychological health among employees : an 8- and 16-week intervention study employees : an 8- and 16-week intervention study</i>. 5806. <a href="https://doi.org/10.1080/10615806.2017.1405261">https://doi.org/10.1080/10615806.2017.1405261</a></p>                                                                                                   | <p>Study population: Mild and severe depression patients<br/>Intervention: Yoga</p>   |
| <p>Keng, S., Yim, O. S., Lai, P. S., Chew, S. H., &amp; Ebstein, R. P. (2019). <i>Association among dispositional mindfulness , self-compassion , and leukocyte telomere length in Chinese adults</i>. 1–10.</p>                                                                                                                                                                                                                                          | <p>Outcome: Correlation between Mindfulness and telomere length</p>                   |
