# Supplementary material for: The effects of meditation on length of telomeres in healthy individuals: a systematic review
Source: Springer Nature journal article supplement (doi:10.1186/s13643-021-01699-1), 2021-05-21
Supplement: MOESM4 [file 19185924]

**Table 4: Details of the interventions included in the review**

| <b>Study</b>           | <b>Intervention(s)</b>                                                                                                                                                                           | <b>Duration</b>        | <b>Process</b>                                                                                                                                                                                                                                                                                                                                                                         |
|------------------------|--------------------------------------------------------------------------------------------------------------------------------------------------------------------------------------------------|------------------------|----------------------------------------------------------------------------------------------------------------------------------------------------------------------------------------------------------------------------------------------------------------------------------------------------------------------------------------------------------------------------------------|
| Hoge et al., 2013      | Loving-kindness meditation                                                                                                                                                                       | 4 years or more        | Regular, nearly daily practice<br>Must have attended at least one overnight retreat of 3 days or more                                                                                                                                                                                                                                                                                  |
| Alda et al., 2016      | Zen meditation                                                                                                                                                                                   | More than 10 years     | Continuous meditation practice with a mean of at least 60 minutes/day of formal practice                                                                                                                                                                                                                                                                                               |
| Le et al., 2019        | Loving-kindness meditation<br>Mindfulness meditation                                                                                                                                             | 6 weeks                | Meditation workshop designed to follow health-based format that used six progressive, 1-hour small group sessions with comparable resources and encouragement for individual home practice.<br><br>Participants received homework assignments and five 20-minute audio-recorded guided meditations and were encouraged to cultivate a daily meditation practice, besides the workshop. |
| Puhlmann. et al., 2019 | Presence, affect, and perspective meditation programs<br>(Presence: breathing and body-scan meditation<br>Affect: loving-kindness meditation and affect dyad<br>Perspective: observing thoughts) | 3 months for each type | Each meditation program began with a 3-day silent retreat. participants attended weekly 2-hour group sessions and performed the 2 core practices of each session at home for approximately 30 minutes daily for the remainder of the training period                                                                                                                                   |
| Mendioroz et al., 2020 | Mindfulness meditation                                                                                                                                                                           | More than 10 years     | Continuous meditation with a mean of at least 60 minutes/day of formal practice                                                                                                                                                                                                                                                                                                        |
